# Supplementary material
Source: Research Square preprint supplement (doi:10.21203/rs.3.rs-8719564/v1)
Supplement: Supplementary file 1 [file 2cd55453b0c40bbf02cb322d.docx]

**Annexure**

**Declaration – The questionnaire used in this study is developed by the authors solely for the purpose of this study and has not been previously used by any other study or any other author for otyher purposes**

**QUESTIONNAIRE**

- Basic demographic data
- Socio economic status(Based on modified kuppuswamy classification )-I-V
- Marital status a)Unmarried b) Married and not living with partner c) Married and living with partner
- Children a) Yes b) No
- Age a) <40 years b) 40 – 60 years c) >60 years
- Education a) Up to middle school b) High school c) Undergraduate d) post graduate
- When did you first notice lump/other symptom a) <3months b) 3-6 months c) >6 months
- Who did you first confide in ?
- Did they encourage you to seek medical help?
- Why did you not seek care earlier? a) Unaware that this could mean cancer b) Fear of diagnosis c) Change in symptoms d)Others

11)Are you aware of a disease called breast cancer?

12)If yes how do you know about it ? a) Newspaper b) Radio c) Tv d) Mobile e) Word of mouth

13)Which of the following do you think is a symptom of breast cancer? a)Lump b)Pain c) Nipple discharge d)Axillary swelling e) All of the above

14)Do you think breast cancer is treatable ? a) Yes b) No

15)Are you aware of the treatment options of breast cancer ? a)Yes b) No

16)Have you ever been part of any awareness program in the past? A) Yes b) No

17)Do you think breast cancer is transmissible ? A) Yes b) No

18)Were your family members supportive of you when you received the diagnosis? a) Yes b) No

19)Do you think treatment for breast cancer is excessively painful ? A)Yes b) No

20)Do you think treatment for breast cancer would be a financial burden ? A) Yes b) No

21)Are you aware of method for self breast examination? A) Yes b) No

22)How often do you check your breasts? A) Once a month b) Once in 6 months c) Never

Did you ever seek medical/surgical treatment for any other ailment ? A) Yes b) No

23)Risk factors assessed – Yes or No questions -Familial risk/ Early menarche / Parity /Breast feeding /HRT/Obesity/Breast density / Smoking / Alcoholism

From the questionnaire, these items reflect *awareness/knowledge*:

| **Q#** | **Item** | **Awareness Domain** |
| --- | --- | --- |
| 11 | Aware of breast cancer | Basic awareness |
| 12 | Source of knowledge | Exposure |
| 13 | Awareness of symptoms | Knowledge—clinical |
| 14 | Breast cancer treatable? | Knowledge—treatment |
| 15 | Awareness of treatment options | Knowledge—treatment |
| 16 | Attended awareness program | Exposure |
| 17 | Transmissibility | Misconception |
| 21 | Aware of self-breast exam | Screening knowledge |
| 22 | Frequency of breast checks | Screening practice |
|  |  |  |

**(A) Basic Awareness (Q11)**

- Yes = **1**
- No = **0**

**(B) Knowledge Source (Q12)**

(Exposure increases awareness capacity)

- Each source = **1 point**
  (0–5 range)

**(C) Symptom Knowledge (Q13)**

Expected correct answer = “All of the above”

- Correct = **2**
- Incorrect (any other option) = **0**

(Rationale: Symptom literacy is strongly predictive of early presentation; hence 2 points)

**(D) Treatment Knowledge (Q14–Q15)**

**Q14: Treatable?**

- Yes = **1**
- No = **0**

**Q15: Treatment options known?**

- Yes = **1**
- No = **0**

**(E) Awareness Program Exposure (Q16)**

- Yes = **1**
- No = **0**

**(F) Misconceptions (Q17: Transmissible?)**

Correct answer = “No”

- Correct = **1**
- Incorrect = **0**

**(G) Screening Knowledge & Practice (Q21–Q22)**

**Q21: Heard of SBE**

- Yes = **1**
- No = **0**

**Q22: Frequency of SBE**
Scoring based on recommended guidelines (monthly preferred):

- Once a month = **2**
- Once in 6 months = **1**
- Never = **0**

**H**. Q23 listed 9 risk factors:

1. Familial risk
2. Early menarche
3. Parity
4. Breastfeeding
5. HRT (Hormone Replacement Therapy)
6. Obesity
7. Breast density
8. Smoking
9. Alcoholism

For each one, the patient answers **Yes/No** (i.e., they know it is a risk factor or not).

| **Risk Factor** | **Direction** | **Correct Knowledge** |
| --- | --- | --- |
| Familial risk | ↑ | Yes |
| Early menarche | ↑ | Yes |
| Nulliparity | ↑ | Yes |
| Breastfeeding | ↓ | **No increases risk** → So correct knowledge = **Yes, breastfeeding is protective** (or No, it does not increase risk — depends on how you phrased it) |
| HRT | ↑ | Yes |
| Obesity | ↑ | Yes |
| Breast density | ↑ | Yes |
| Smoking | ↑ | Yes |
| Alcohol | ↑ | Yes |

**Breast Cancer Awareness Score (BCAS) = Sum of points from A to H**

| **Domain** | **Max Score** |
| --- | --- |
| Basic Awareness (Q11) | 1 |
| Knowledge Source (Q12) | 5 |
| Symptom Knowledge (Q13) | 2 |
| Treatment Knowledge (Q14–15) | 2 |
| Awareness Program Exposure (Q16) | 1 |
| Misconception (Q17) | 1 |
| Screening Knowledge & Practice (Q21–22) | 3 |
| Risk factor (9 factors assesses) (Q23). 9 |  |
| **TOTAL 24** |  |

Low BCAS – 0-8

Medium 8-16

High >16
